# Supplementary material for: ns-μs Time-Resolved Step-Scan FTIR of ba3 Oxidoreductase from Thermus thermophilus: Protonic Connectivity of w941-w946-w927
Source: MDPI journal article supplement (doi:10.3390/ijms17101657), 2016-09-29
Supplement: s1 [file s1]

# Supplementary Materials: ns- $\mu$ s Time-Resolved Step-Scan FTIR of *ba*<sub>3</sub> Oxidoreductase from *Thermus Thermophilus*: Protonic Connectivity of w941-w946-w927

Antonios Nicolaides, Tewfik Soulimane and Constantinos Varotsis

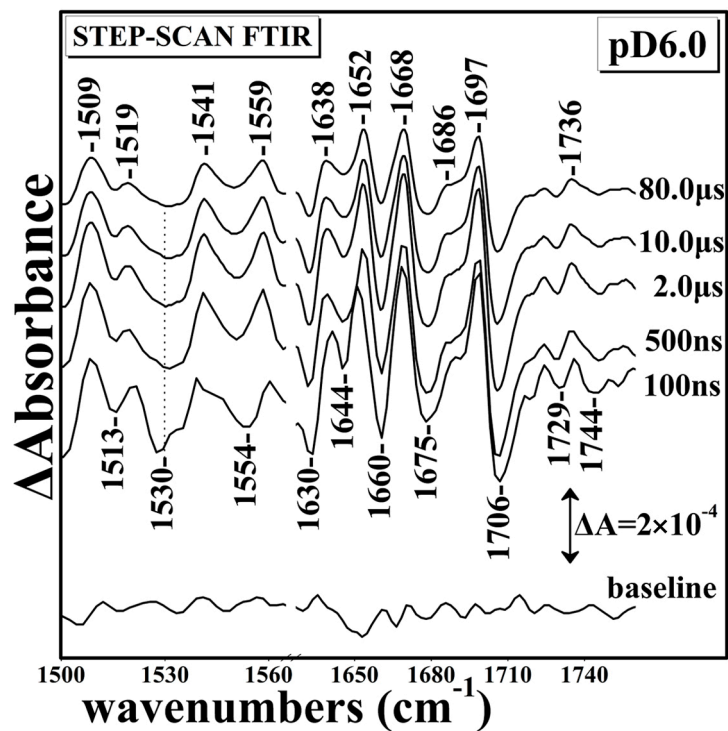

**Figure S1.** Time Resolved Step-Scan Fourier Transform Infrared (TRS<sup>2</sup>-FTIR) difference spectra of 1500–1760  $\text{cm}^{-1}$  area ( $t_d = 100$ –80,000 ns, 4  $\text{cm}^{-1}$  spectral resolution) of fully-reduced *ba*<sub>3</sub>-CO subsequent to CO photolysis by a 7 ns 532 nm laser pulse, at pD 6.0.

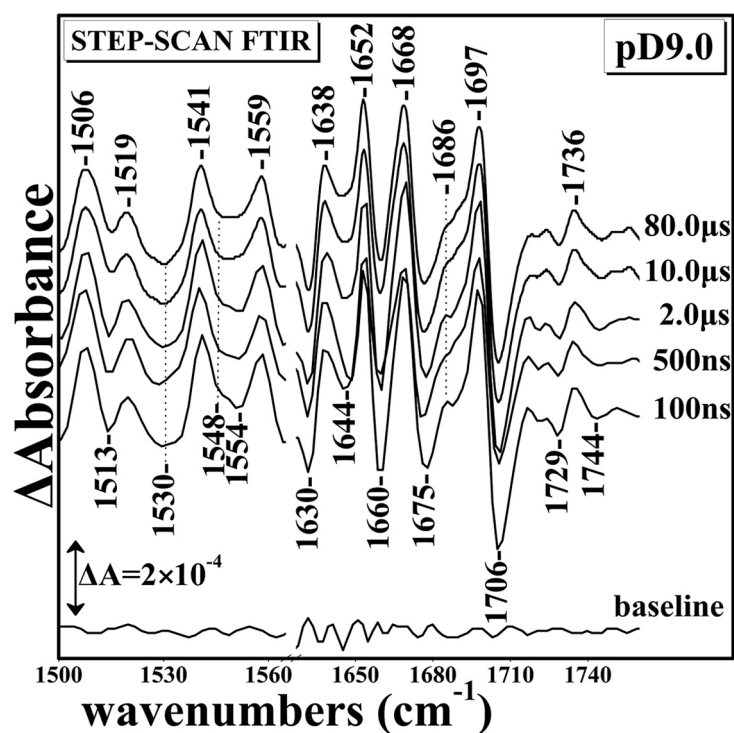

**Figure S2.** Time Resolved Step-Scan Fourier Transform Infrared (TRS²-FTIR) difference spectra of 1500–1760  $\text{cm}^{-1}$  area ( $t_d = 100$ –80,000 ns, 4  $\text{cm}^{-1}$  spectral resolution) of fully-reduced *ba*<sub>3</sub>-CO subsequent to CO photolysis by a 7 ns 532 nm laser pulse at pD 9.0.
